# Supplementary material
Source: Research Square preprint supplement (doi:10.21203/rs.3.rs-9225603/v1)
Supplement: Supplementary file 1 [file 02826270149298f0cf8881cc.docx]

# Supplementary Tables

**Table S1** Codes and explanations according to the Norwegian Classification of Radiological Procedures (NCRP) system.

| **Code** | **Description** |
| --- | --- |
| SKX0AA | X-ray Overview Urinary Tract |
| SKX0CA | X-ray Urography |
| SKX0DA | X-ray micturition cystourethrography |
| SKX0FA | X-ray of the urinary tract with measurement of glomerular filtration rate |
| KXFF00 | Uroflowmetry |
| SKX0AD | CT urinary tract |
| SKX0BD | CT Kidneys and upper urinary tract |
| SKX0BA | X-ray Pyelography |
| SKX0AK | Ultrasound of the urinary tract |
| SKA0BK | Ultrasound of the kidneys |
| SKCOAK | Ultrasound of the urinary bladder |
| TKA0AN | Nuclear Medicine (NM) scintigraphy of the kidneys |
| TKA0BN | NM Renography |

**Table S2** Overview of the number of urinary tract examinations for the various examination codes for the years from 2013 to 2022. CT= Computed Tomography; UT= Urinary Track; US=Ultrasound; NM = Nuclear Medicine; GFR = Glomerular filtration rate.

| **Examination** | **NCRP-code** | **2013** | **2014** | **2015** | **2016** | **2017** | **2018** | **2019** | **2020** | **2021** | **2022** | **Total** | **Percent** |
| --- | --- | --- | --- | --- | --- | --- | --- | --- | --- | --- | --- | --- | --- |
| CT urinary tract (UT) | SKX0AD | 23,023 | 34,299 | 32,353 | 35,591 | 36,768 | 37,076 | 38,157 | 32,529 | 33,053 | 32,375 | 335,224 | 44.8 |
| US of the UT | SKX0AK | 30,876 | 31,880 | 32,757 | 31,196 | 29,380 | 28,485 | 28,146 | 24,721 | 25,981 | 24,249 | 287,671 | 38.5 |
| CT Kidneys and upper UT | SKX0BD | 5,991 | 5,486 | 7,019 | 6,254 | 6,460 | 6,838 | 7,073 | 7,272 | 8,179 | 9,162 | 69,734 | 9.3 |
| X-ray Overview UT | SKX0AA | 4149 | 3838 | 2916 | 2098 | 1417 | 1038 | 737 | 367 | 324 | 247 | 17,131 | 2.3 |
| X-ray Pyelography | SKX0BA | 1,198 | 1,117 | 1,230 | 1,533 | 1,488 | 1,405 | 1,396 | 1,306 | 1,250 | 1,091 | 13,014 | 1.7 |
| X-ray micturition cystourethrography | SKX0DA | 898 | 996 | 1,050 | 1,072 | 1,020 | 989 | 852 | 748 | 759 | 562 | 8,946 | 1.2 |
| Ultrasound of the kidneys | SKA0BK | 11 | 4 | 8 | 26 | 33 | 441 | 1,165 | 1,162 | 1,371 | 1,251 | 5,472 | 0.7 |
| NM Renography | TKA0BN | 756 | 684 | 763 | 646 | 602 | 569 | 375 | 283 | 219 | 165 | 5,062 | 0.7 |
| NM scintigraphy of the kidneys | TKA0AN | 686 | 707 | 559 | 500 | 517 | 522 | 443 | 405 | 407 | 311 | 5,057 | 0.7 |
| Uroflowmetry | KXFF00 | 168 | 154 | 0 | 0 | 0 | 322 | 0 | 0 | 0 | 0 | 644 | 0.1 |
| X-ray of UT with GFR measurement | SKX0FA | 2 | 1 | 1 | 1 | 0 | 2 |  | 7 | 0 | 0 | 14 | 0 |
| **Total** | All codes | **67,758** | **79,166** | **78,656** | **78,917** | **77,685** | **77,687** | **78,344** | **68,800** | **71,543** | **69,413** | **747,969** | **100** |

# Supplementary Figure


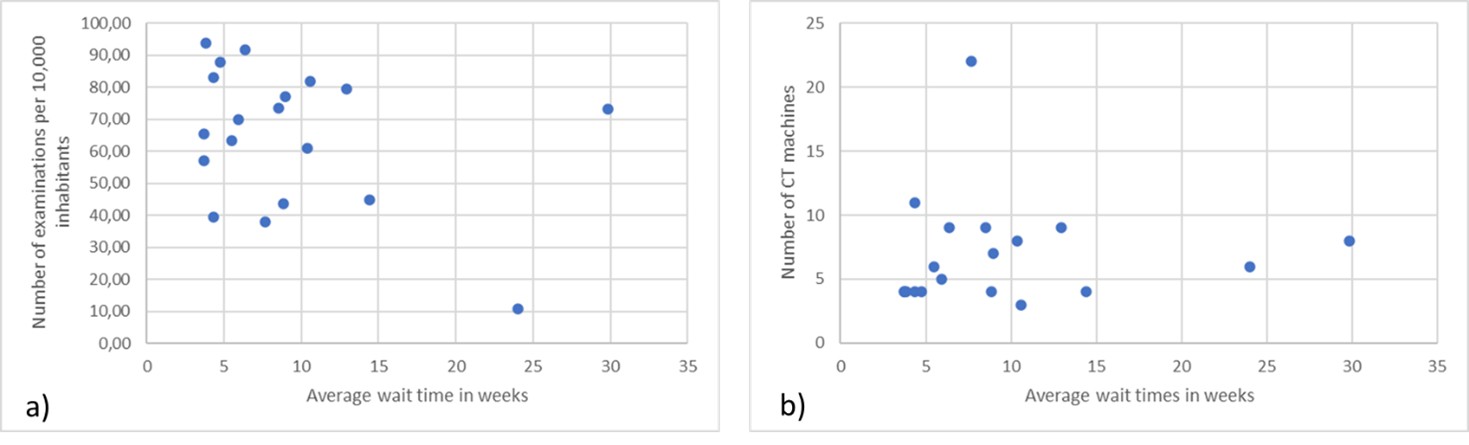


**Figure S1** Scatter plot of number of CTs of the urinary tract per 10,000 inhabitants (a) and number of CT machines (b) versus average wait time in weeks for the various hospital trusts
